# Supplementary material for: GLP-1 Receptor Agonists in Kidney Transplant Recipients with Type 2 Diabetes Mellitus: A Systematic Review and Meta-Analysis on Mortality and Major Adverse Kidney Events
Source: Research Square preprint supplement (doi:10.21203/rs.3.rs-7859743/v1), 2025-10-29

**Supplementary Figure 1. Leave-one-out sensitivity analysis for mortality.** Results obtained when each study is left out of each analysis: A) Lin et al; B) Orandi et al; C) Sahi et al.

A


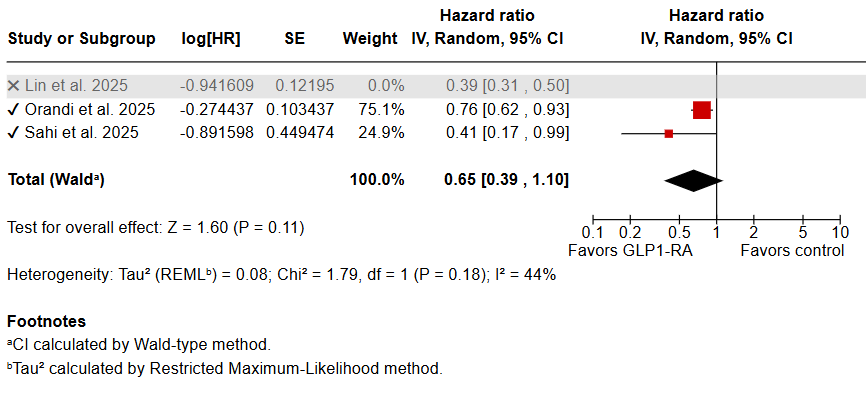


**B**


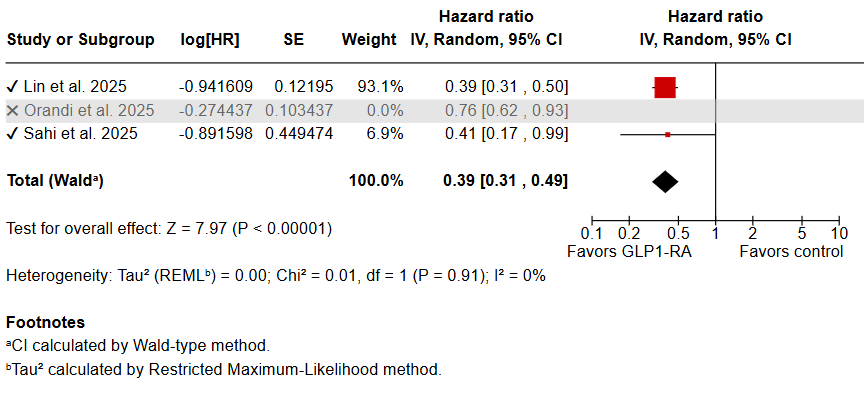


**C**


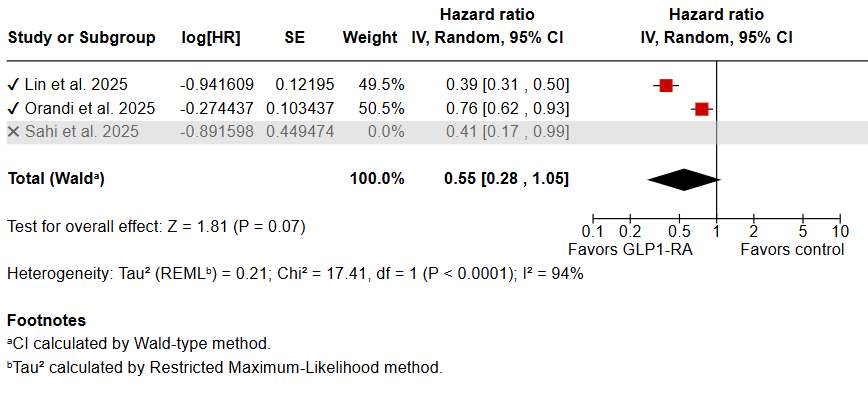


**Supplementary Figure 2.** Leave-one-out sensitivity analysis for MAKE. Results obtained when each study is left out of each analysis: (A) Cohen et al., (B) Lin et al., (C) Orandi et al.

**A**


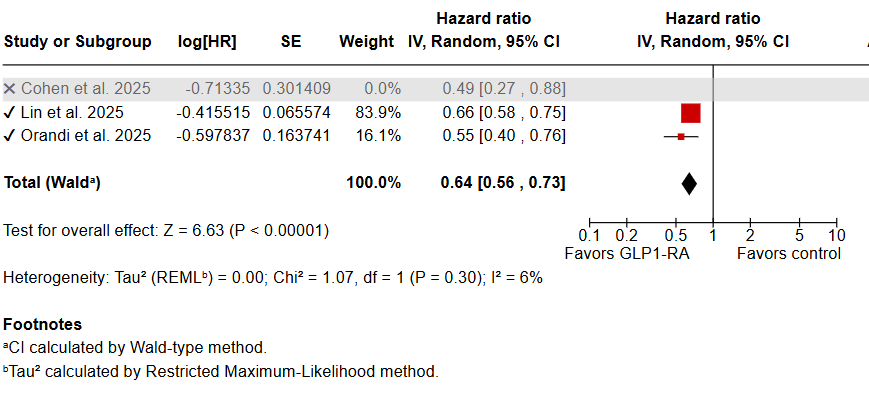


**B**


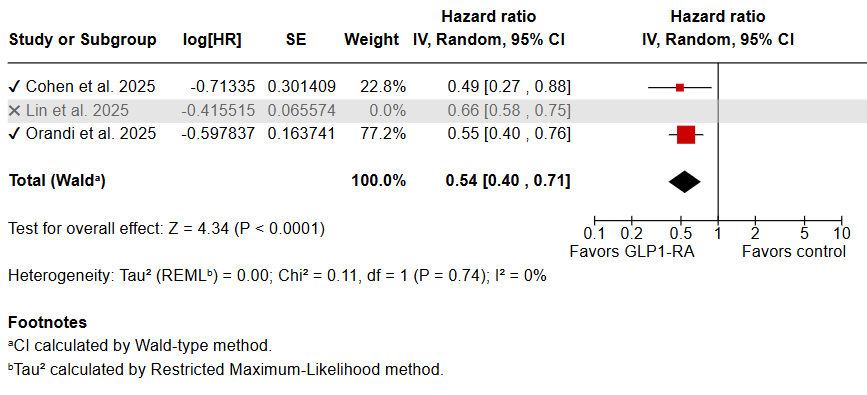


**C**


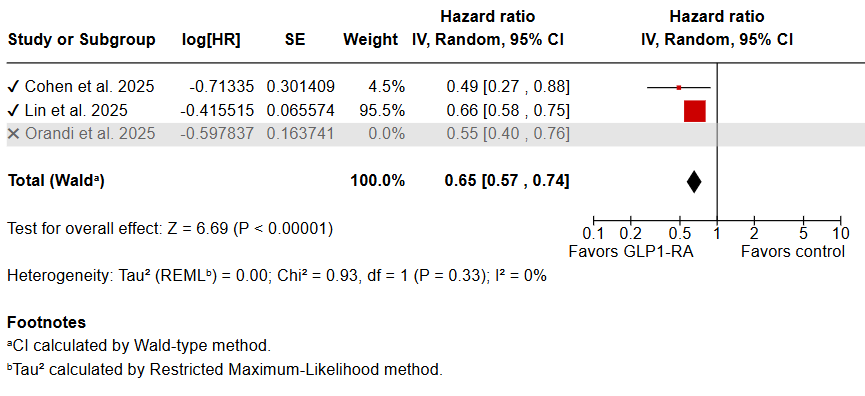


**Supplementary Figure 3. Funnel plot for A) mortality and B) MAKEs.**

**A**

**
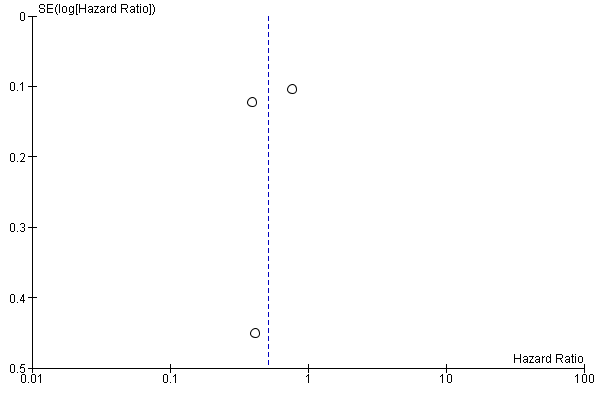
**

**B**

**
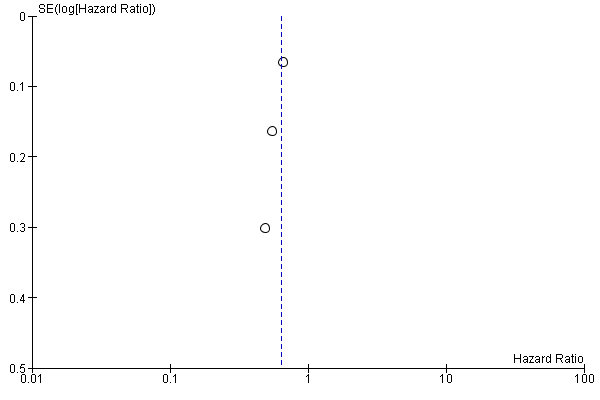
**

**Supplementary Figure 4. Risk of bias summary for observational studies (ROBINS-I).**


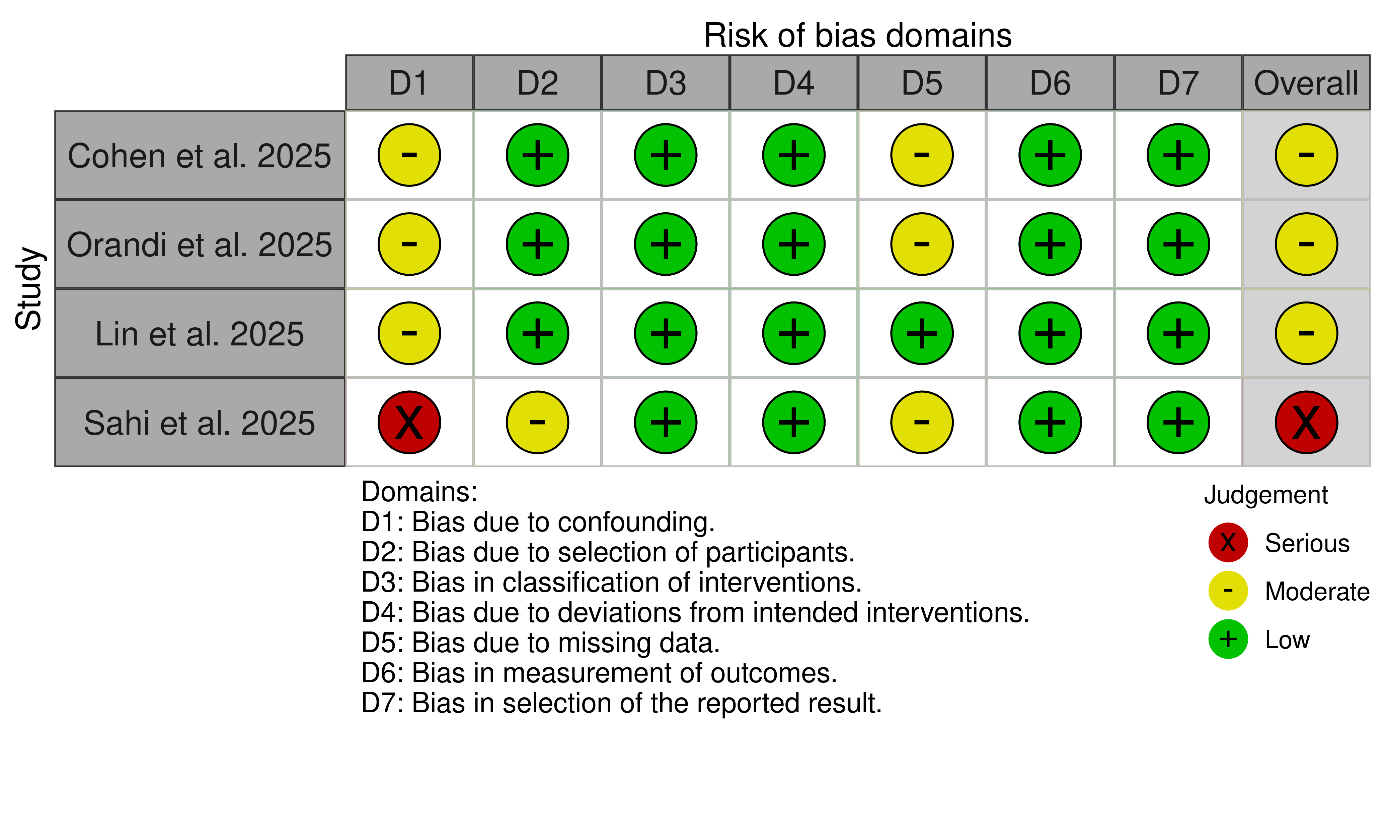


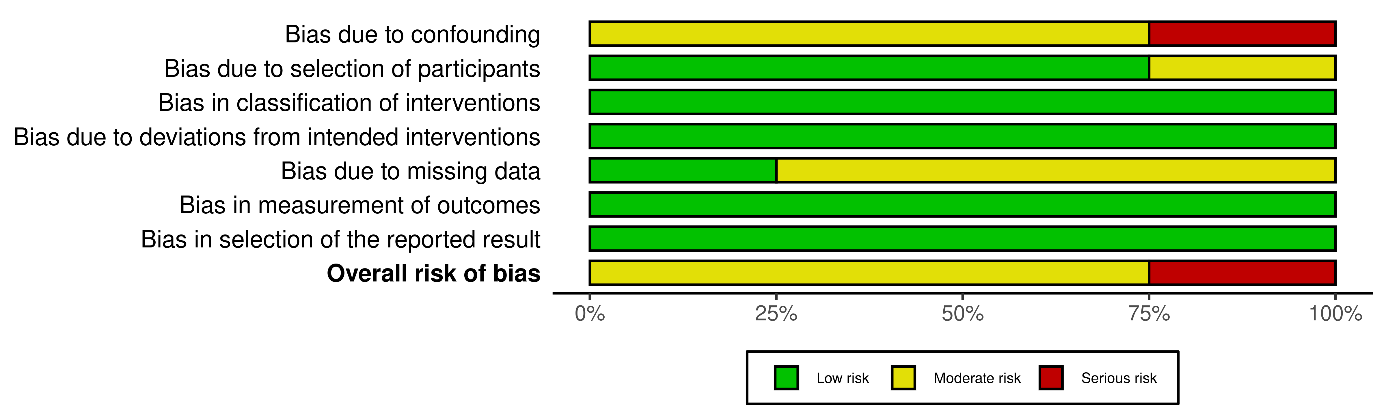

Supplement: Supplementary file 1 [file 0ffad526855a9b7378e3cbf3.docx]
